# Supplementary material
Source: PubMed Central journal article supplement (PMC2739144)
Supplement: supp_136_19_3279__1.pdf [file supp_136_19_3279__1.pdf]

**Table S1. Seed set of siliques resulting from crosses of *anx* mutants to the wild type or *dde2-2* mutant**

| Genotype                           | Natural self-pollination | Manual self-pollination | As a male donor       | As a female receiver   |
|------------------------------------|--------------------------|-------------------------|-----------------------|------------------------|
| <i>anx1-1/anx1-1 anx2-1/ANX2</i>   | 79.5 ( <i>n</i> =518)    | 92.3 ( <i>n</i> =499)   | 91.7 ( <i>n</i> =471) | 91.3 ( <i>n</i> =453)  |
| <i>anx1-2/anx1-2 anx2-2/ANX2</i>   | 79.3 ( <i>n</i> =474)    | 93.3 ( <i>n</i> =578)   | 90.2 ( <i>n</i> =563) | 93.2 ( <i>n</i> =504)  |
| <i>anx1-2/anx1-2 anx2-2/anx2-2</i> | 0 ( <i>n</i> =505)       | nd                      | 0 ( <i>n</i> =450)    | 90 ( <i>n</i> =584)    |
| Col-0                              | 92.4 ( <i>n</i> =875)    | 94.1 ( <i>n</i> =476)   | 92.4 ( <i>n</i> =957) | 90.9 ( <i>n</i> =1034) |

nd, not determined.
